# Supplementary material
Source: PubMed Central journal article supplement (PMC3767415)
Supplement: NIHMS515995-supplement-Supp_Tables.pdf [file NIHMS515995-supplement-Supp_Tables.pdf]

**Supplementary Material/Online Table 1. Professional meetings where the DSM-5 Substance Use Disorder Workgroup presented changes under consideration**

| <b>Venue</b>                                                      | <b>Location</b>   | <b>Date</b>     |
|-------------------------------------------------------------------|-------------------|-----------------|
| NIDA Clinical Trials Network Steering Committee                   | Bethesda, MD      | September, 2007 |
| Columbia University, Dept. of Psychiatry Grand Rounds             | New York, NY      | January, 2009   |
| Yale University, Dept. of Psychiatry Grand Rounds                 | New Haven, CT     | February, 2009  |
| Alcohol Research Group                                            | Oakland, CA       | March, 2009     |
| American Psychiatric Association                                  | San Francisco, CA | May, 2009       |
| College on Problems of Drug Dependence                            | Reno, NV          | June, 2009      |
| Research Society on Alcoholism                                    | San Diego, CA     | June, 2009      |
| American Psychological Association                                | Toronto, Canada   | August, 2009    |
| National Defense Medical Center                                   | Taipei, Taiwan    | September, 2009 |
| Peking University                                                 | Beijing, China    | September, 2009 |
| Washington Univ., Dept. of Psychiatry Research Seminar            | St. Louis, MO     | October, 2009   |
| SUNY Downstate, Henri Begleiter Memorial Grand Rounds             | Brooklyn, NY      | March, 2010     |
| American Psychiatric Association                                  | New Orleans, LA   | May, 2010       |
| Research Society on Alcoholism                                    | San Antonio, TX   | June, 2010      |
| College on Problems of Drug Dependence                            | Phoenix, AZ       | June, 2010      |
| American Psychological Association                                | San Diego, CA     | August, 2010    |
| NIDA Genetics Consortium                                          | Bethesda, MD      | November, 2010  |
| Winter Conference on Brain Research                               | Keystone, CO      | January, 2011   |
| University of Connecticut Psychiatry Grand Rounds                 | Farmington, CT    | February, 2011  |
| NIDA Clinical Trials Network Steering Committee                   | Bethesda, MD      | March, 2011     |
| Meeting of Social Sciences                                        | Bordeaux, France  | March 18, 2011  |
| American Society of Addiction Medicine                            | Washington, DC    | April, 2011     |
| American Psychological Association                                | Washington, DC    | August, 2011    |
| International Society of Addiction Medicine                       | Oslo, Norway      | September, 2011 |
| European Society for Biomedical Research on Alcoholism            | Vienna, Austria   | September, 2011 |
| APA Institute on Psychiatric Services                             | San Francisco, CA | October, 2011   |
| International Congress on Dual Disorders                          | Barcelona, Spain  | October, 2011   |
| American Public Health Association                                | Washington, DC    | October, 2011   |
| University of Pennsylvania, Grand Rounds Seminar                  | Philadelphia, PA  | October, 2011   |
| Yale University, Dept. of Psychiatry Grand Rounds                 | New Haven, CT     | October, 2011   |
| American Academy of Addiction Psychiatry                          | Scottsdale, AZ    | December, 2011  |
| Georgia State University Center for the Economic Analysis of Risk | Atlanta, GA       | April, 2012     |
| Columbia University Drugs and Society Seminar Series              | New York, NY      | April, 2012     |

**Online Table 2. Proposed DSM-5 substance use disorder criteria: factor and Item Response Theory results using criteria required to persist across three years of follow-up, N=34,653<sup>a</sup>**

| CRITERION                       | Prevalence (%) | Factor Loadings | Criterion response model parameters |                       |
|---------------------------------|----------------|-----------------|-------------------------------------|-----------------------|
|                                 |                |                 | Severity (s.e.)                     | Discrimination (s.e.) |
| <b>DSM-IV dependence</b>        |                |                 |                                     |                       |
| Tolerance                       | 3.8            | .74             | 2.29 (.040)                         | 2.19 (.068)           |
| Withdrawal                      | 4.0            | .84             | 2.05 (.030)                         | 2.99 (.098)           |
| Larger/longer                   | 7.0            | .87             | 1.69 (.020)                         | 3.35 (.107)           |
| Quit/control                    | 5.6            | .76             | 2.03 (.033)                         | 2.26 (.064)           |
| Time spent                      | 1.4            | .89             | 2.39 (.037)                         | 4.10 (.200)           |
| Activities given up             | 0.5            | .93             | 2.70 (.054)                         | 4.96 (.388)           |
| Physical/psychological problems | 2.8            | .91             | 2.08 (.026)                         | 4.29 (.218)           |
| <b>DSM-IV abuse</b>             |                |                 |                                     |                       |
| Hazardous use                   | 6.1            | .77             | 1.94 (.036)                         | 2.38 (.076)           |
| Social/interpersonal problems   | 1.2            | .92             | 2.40 (.035)                         | 4.69 (.293)           |
| Neglected major roles           | 0.5            | .93             | 2.65 (.042)                         | 5.21 (.364)           |
| Craving                         | 2.2            | .83             | 2.34 (.035)                         | 3.02 (.120)           |

<sup>a</sup> Data source: National Epidemiologic Survey on Alcohol and Related Conditions, Wave 2 (2004-2005) conducted by the National Institute on Alcohol Abuse and Alcoholism<sup>6</sup>, whose participants were non-institutionalized civilians aged 18 and older at their Wave 1 interview in 2001-2002 (N=34,653). Sample included current drinkers at Wave 1 (2001-2001) who participated in Wave 2. As reported in detail elsewhere<sup>6</sup>, the NESARC had a multistage design and oversampled Blacks, Hispanics and young adults. Analyses incorporated sample weights to adjust for the complex sample design and non-response.

Mplus version 6.12 (211) was used for the analyses. Specifically in the IRT analyses, a 2 parameter logistic Item Response model (2-PL IRM) was used, allowing both discrimination and severity parameters to be estimated for each item (criterion). IRT contains two somewhat interrelated assumptions, one, that the underlying latent construct which the items measure is unidimensional, and secondly, that all the item indicators are locally independent. Local independence is assumed present if unidimensionality is established. To ensure unidimensionality, confirmatory factor analysis (CFA) was conducted using the weighted least squares means and variance adjusted (WLSMV) estimator, best suited in the presence of binary indicators (0=not endorsed, 1=endorsed).
